# Supplementary material
Source: PubMed Central journal article supplement (PMC4378166)
Supplement: supp_pp.114.255216_255216Supplemental_Data_Rev_3.pdf [file supp_pp.114.255216_255216Supplemental_Data_Rev_3.pdf]

## SUPPLEMENTAL DATA

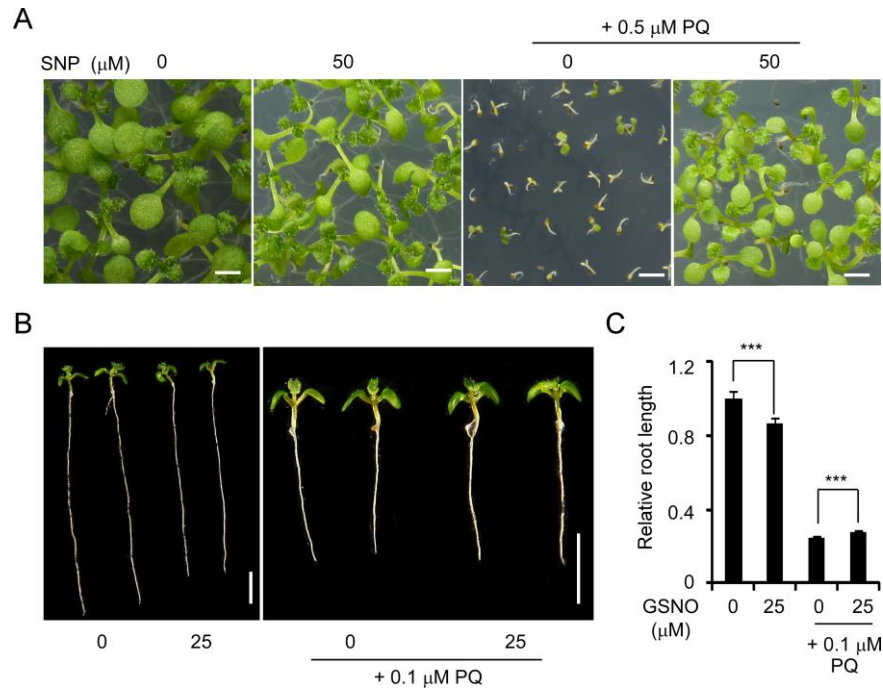

### Supplemental Figure S1 Nitric oxide enhances the resistance to oxidative stress.

A, Seven-day-old Col-0 seedlings treated with various combinations of paraquat (PQ; 0.5  $\mu\text{M}$ ) and sodium nitroprusside (SNP). Scale bars, 0.5 cm.

B, Ten-day-old Col-0 seedlings treated with various combinations of GSNO and paraquat (PQ) (0.1  $\mu\text{M}$ ). Scale bars, 0.5 cm.

C, Analysis of the relative length of the primary roots shown in (B). The relative root length of Col-0 seedlings grown under normal growth condition is set at 1.0. At least 30 seedlings were used for each sample. Error bars indicate SD from three independent experiments (biological replicates). Two-tailed student's *t*-test, \*\*\* indicates  $P < 0.001$ .

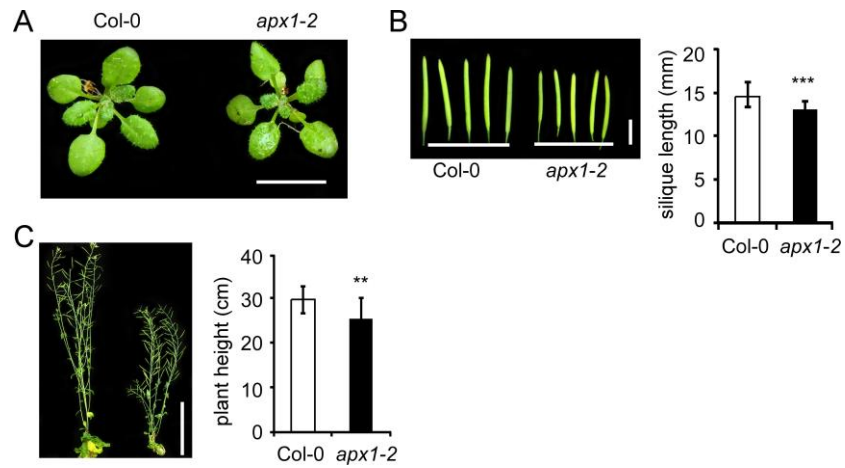

### Supplemental Figure S2 The *apx1-2* mutant phenotype.

A, Four-week-old Col-0 and *apx1-2* seedlings grown under 16h light/8h dark cycle. Scale Bar, 1 cm.

B, Siliques derived from 13-week-old Col-0 and *apx1-2* plants. Bar, 5 mm. Quantitative analysis of the siliques length shown at the right ( $n = 30$ ).

C, Thirteen-week-old Col-0 and *apx1-2* mutant plants. Bar, 5 cm. Quantitative analysis of the plant height shown at the right ( $n = 30$ ).

Error bars in (B) and (C) indicate SD from three independent experiments (biological replicates).

Two-tailed student's *t*-test, \*\* and \*\*\* indicate  $P < 0.01$  and  $P < 0.001$ , respectively.

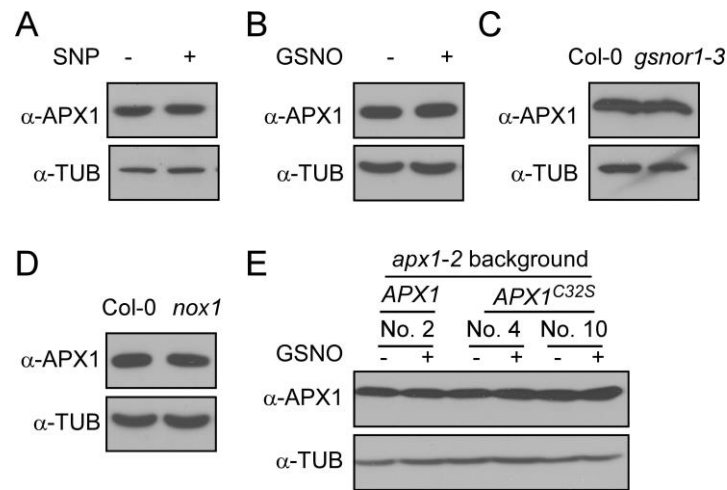

### Supplemental Figure S3 Analysis of the accumulation of APX1 protein.

A and B, Accumulation of APX1 protein in Col-0 treated with 50  $\mu$ M sodium nitroprusside (SNP) (A) or 200  $\mu$ M GSNO (B).

C and D, Accumulation of APX1 protein in Col-0, *gsnor1-3* (C) and *nox1* (D) seedlings.

E, Accumulation of APX1 protein in transgenic plants with the indicated genotypes (numbers refer to the transgenic lines).

APX1 protein was detected by immunoblotting using an anti-APX1 antibody. Equal loading was verified using an anti-TUBULIN antibody.

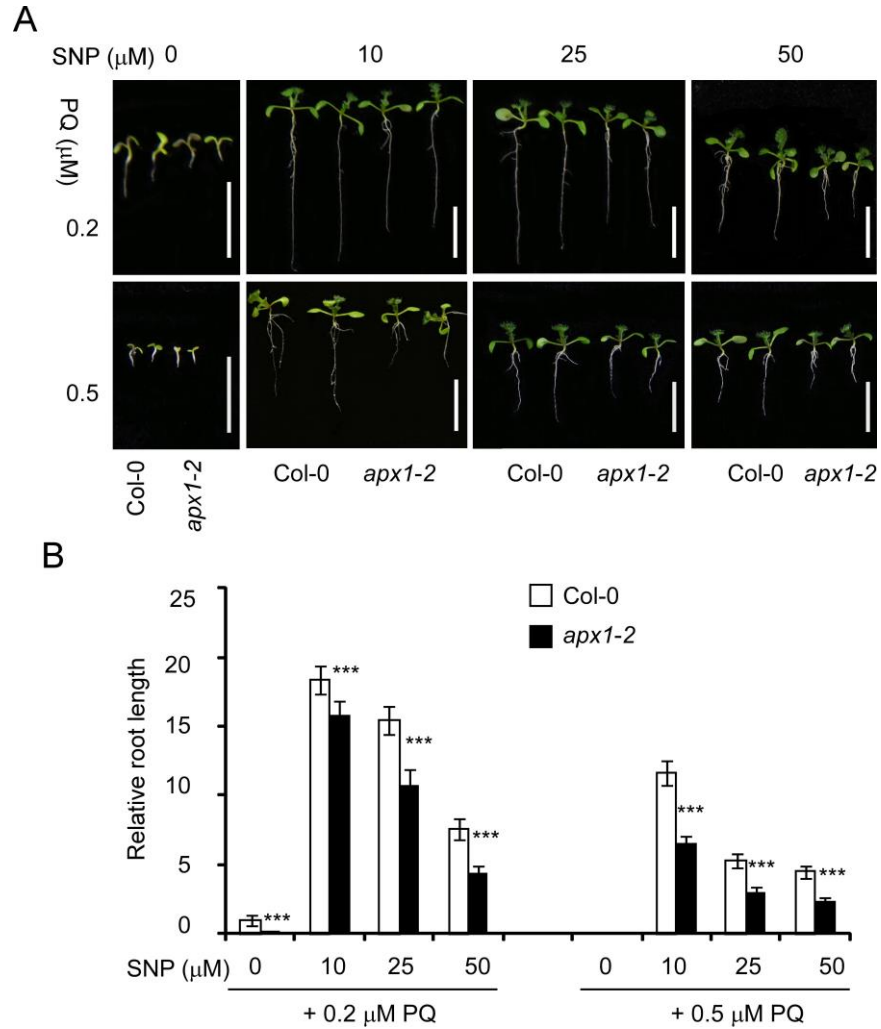

**Supplemental Figure S4 Sodium nitroprusside enhances the resistance to oxidative stress.**

A, Ten-day-old seedlings of Col-0 and *apx1-2* germinated and grown on 1/2 MS agar plates supplemented with various combinations of sodium nitroprusside (SNP) and paraquat (PQ). Scale bar, 1 cm.

B, A quantitative analysis of the relative root length shown in (A) ( $n = 30$ ). The relative root length of Col-0 seedlings grown under normal growth condition is set at 1.0. Error bars indicate SD from three independent experiments (biological replicates). Two-tailed student's *t*-test, \*\*\* indicates  $P < 0.001$ .

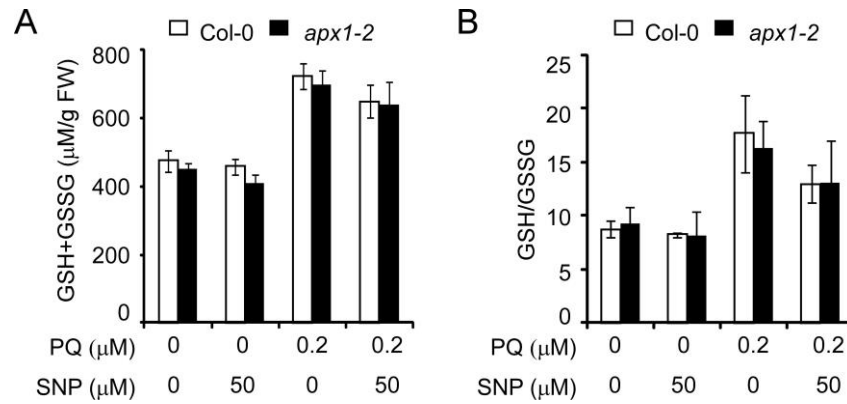

### Supplemental Figure S5 Analysis the GSH and GSSG level.

A and B, Analysis the GSH+GSSG content (A) and the GSH/GSSG level (B) in 10-day-old seedlings of Col-0 and *apx1-2* germinated and grown on 1/2 MS agar plates supplemented with various combinations of sodium nitroprusside (SNP) and paraquat (PQ). Error bars indicate SD from three independent experiments (biological replicates).



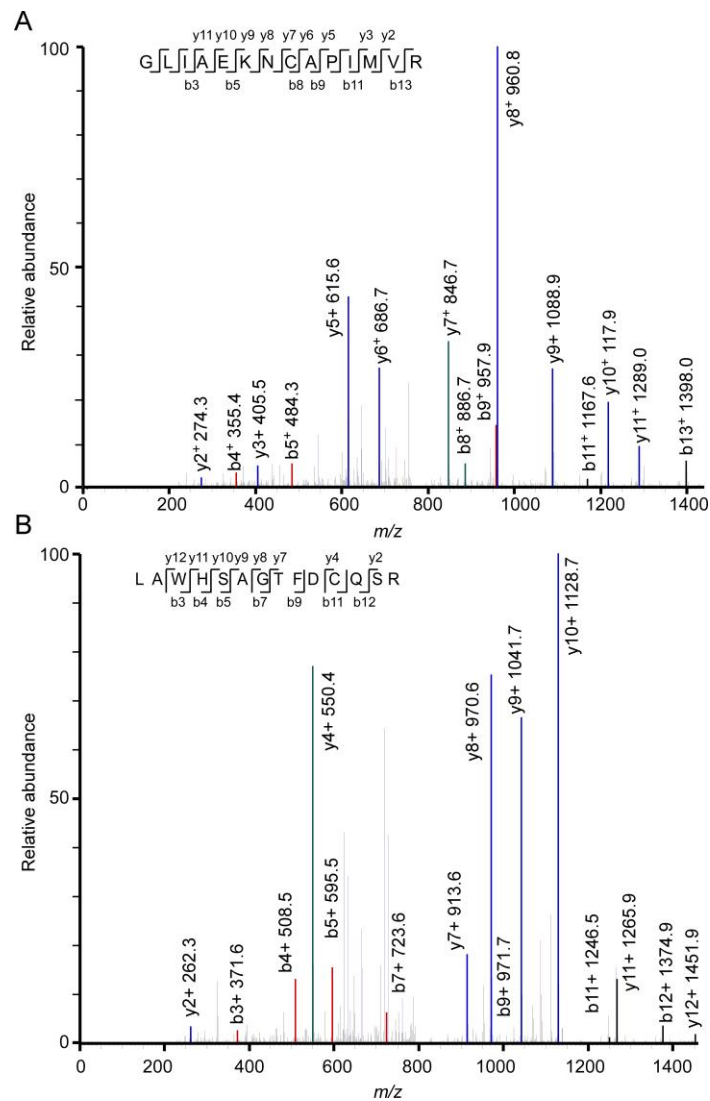

### Supplemental Figure S7 Mass spectra of APX1 peptides.

A and B, tryptic peptides containing Cys<sup>32</sup> (A) and Cys<sup>49</sup> (B) derived from native His-APX1 recombinant protein identified by mass spectrometry.

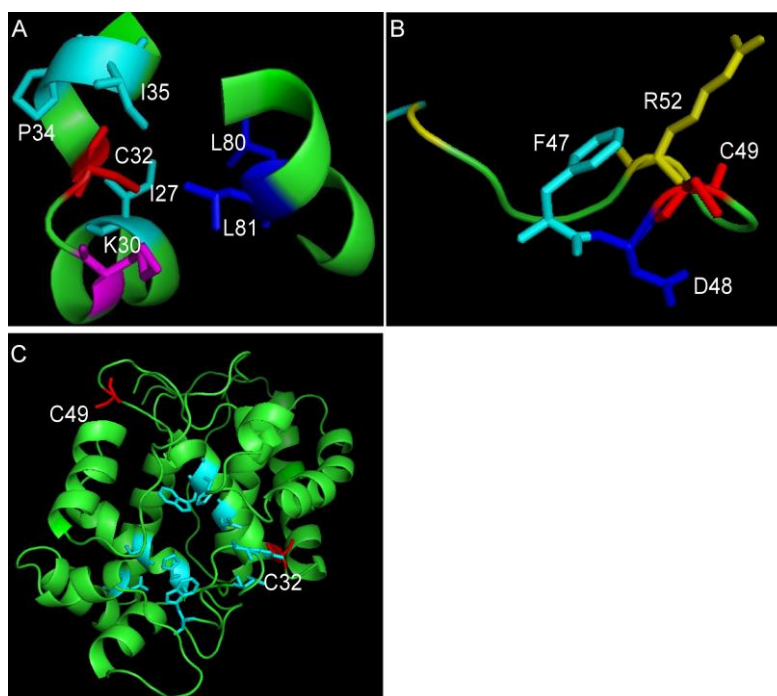

### Supplemental Figure S8 Structural modeling of Arabidopsis APX1.

A and B, The putative local structures of APX1 around Cys<sup>32</sup> (A) and Cys<sup>49</sup> (B). The surrounding residues of Cys<sup>32</sup> and Cys<sup>49</sup> are also shown, which represent typical acid-base/hydrophobic motifs for *S*-nitrosylation.

C, The putative structure of APX1. Cys<sup>32</sup> is adjacent to the enzymatic active center (indicated as blue). The modeling was performed using the *Glycine max* APX1 protein structure (PDB code: 1OAF) as a training template.

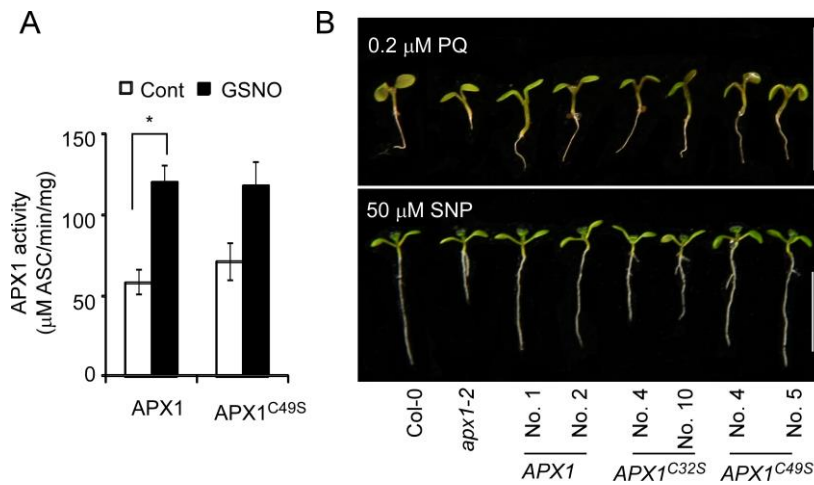

### Supplemental Figure S9 Functional characterization of Cys<sup>49</sup> of APX1.

A, Analysis of the enzymatic activity of APX1 and APX<sup>C49S</sup> recombinant proteins. Error bars indicate SD from three independent experiments (biological replicates); \* indicates  $P < 0.05$  (Student's  $t$ -test).

B, Analysis of the phenotype of transgenic plants carrying various transgenes with the indicated genotypes (all transgenics were in the *apx1-2* background).

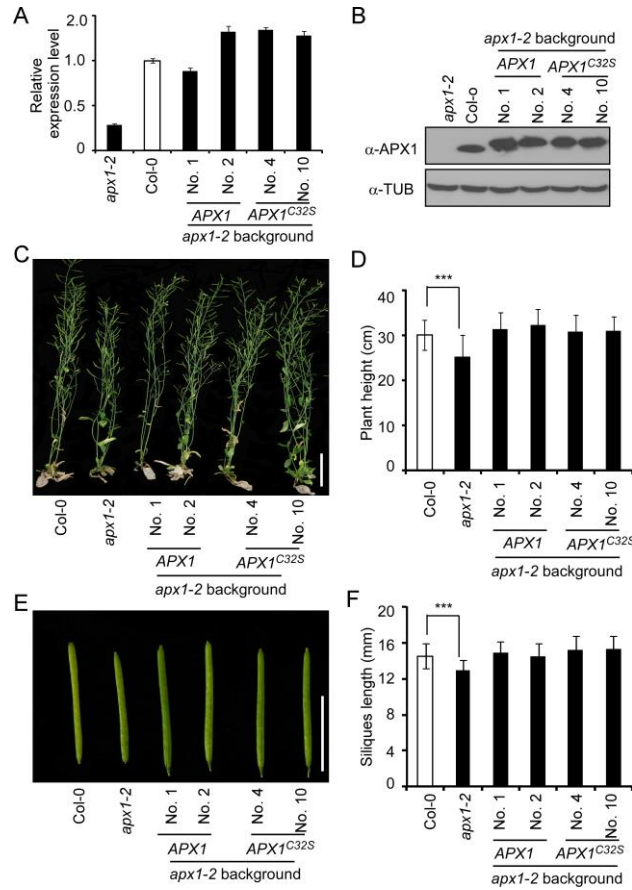

### Supplemental Figure S10 Characterization of *APX1* transgenic plants.

A, Analysis of *APX1* expression in 10-day-old seedlings with the indicated genotypes (numbers refer to the transgenic lines) by RT-qPCR.

B, Analysis of APX1-FLAG proteins in 10-day-old seedlings with the indicated genotypes by immunoblotting using an anti-APX1 antibody.

C, Nine-week-old plants grown under continuous white light. Bar, 5 cm.

D, Quantitative analysis of the plant height shown in (C).  $n = 30$ .

E, Siliques derived from plants shown in (C). Bar, 1 cm.

F, Quantitative analysis of the siliques length shown in (E).  $n = 30$ .

Error bars in (D) and (E) indicate SD from three independent experiments (biological replicates).

Two-tailed student's *t*-test, \*\* and \*\*\* indicate  $P < 0.01$  and  $P < 0.001$ , respectively.

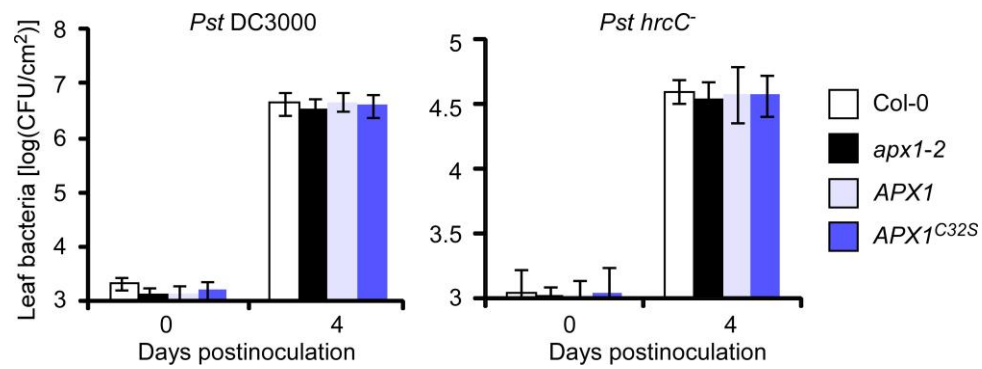

**Supplemental Figure S11 Analysis of bacterial growth in *apx1-2* and transgenic plants.**

Leaves derived from 4-week-old plants with the indicated genotypes were inoculated with *P. syringae* DC3000 and *hrcC*<sup>-</sup> bacteria cell cultures. The bacterial population in the leaf was determined 4 days post-inoculation. Error bars indicate SD from eight technical replicates.

**Supplemental Table S1 Primers used in this study**

| <b>Primer</b> | <b>Sequences (5' to 3')</b>      | <b>Experiments</b>   |
|---------------|----------------------------------|----------------------|
| APX1F1        | GGGATCCATGACGAAGAACTACCCAACCGTG  | His-APX1             |
| APX1B1        | GGTCGACTTAAGCATCAGCAAACCCAAGCTC  | His-APX1             |
| APX1F2        | CCTCGAGACACGACTTCCGTCGAGTAGATTC  | APX1 genomic DNA     |
| APX1B2        | GCCCCGGGAGCATCAGCAAACCTGCAACCAAC | APX1 genomic DNA     |
| APX1F3        | GTTGAAGTTACTGGTGGCCCTGA          | Genotyping           |
| APX1B3        | AGCAGCGTATTTCTCGACCAAAGG         | Genotyping           |
| APX1F4        | GTTGAAGTTACTGGTGGCCCTGA          | Genotyping           |
| APX1B4        | CACACACACAGAGCATACGTCACAGC       | Genotyping           |
| APX1C32SF     | TTTGATCGCTGAGAAGAACTCTGCACCCATCA | APX1 <sup>C32S</sup> |
| APX1C32SB     | GAGTTCTTCTCAGCGATCAAACCTCTGAGCT  | APX1 <sup>C32S</sup> |
| APX1C49SF     | CTCTGCTGGAACTTTCGATTCTCAATCAAGG  | APX1 <sup>C49</sup>  |
| APX1C49SB     | GAATCGAAAGTTCCAGCAGAGTGCCAT      | APX1 <sup>C49S</sup> |
| UBQ5F         | CTTCAGCAGCCGTTGCCTCA             | RT-PCR               |
| UBQ5B         | CTGGTAAACGTAGGTGAGTCC            | RT-PCR               |
| ACT7F2        | TCCATGAAACAACCTTACAACCTCCATCA    | qRT-PCR              |
| ACT7B2        | CATCGTACTCACTCTTTGAAATCCACA      | qRT-PCR              |
| FRK1F         | CGGTCAGATTTCAACAGTTGTC           | qRT-PCR              |
| FRK1R         | AATAGCAGGTTGGCCTGTAATC           | qRT-PCR              |
| NHL10F        | TTCCTGTCCGTAACCCAAAC             | qRT-PCR              |
| NHL10R        | CCCTCGTAGTAGGCATGAGC             | qRT-PCR              |
